# Supplementary material for: Enriching Genomic Resources and Marker Development from Transcript Sequences of Jatropha curcas for Microgravity Studies
Source: Int J Genomics. 2017 Jan 5;2017:8614160. doi: 10.1155/2017/8614160 (PMC5244023; doi:10.1155/2017/8614160)
Supplement: Supplementary file 1 — Appendix A Fig A1 Classification distribution of UASs annotated by blasting eukaryotic orthologous groups (KOG) Fig A2 Pathway classification distribution of UASs annotated in KEGG database Fig A3 Fatty acid biosynthesis pathway. Appendix B Table B1 PCR confirmation of the assembled contigs from Newbler Table B2 List of SSR primers ordered for validation Table B3 List of SNP primers ordered for validation Table B4 Annotation and size of the top 10 longest contigs in the UAS set Table B5 Number of UASs aligned with protein and nucleotide sequences in Arabidopsis, castor bean and cassava Table B6 Number of UAS annotated involved in KEGG pathways Table B7 Thirty selected cold stress regulated genes Table B8 SSR motif types and numbers detected in the jatropha 454 databases Table B9 Details of validated SNPs Table B10 Ten selected jatropha UASs involved in human disease related pathways by KEGG pathway mapping. [file 8614160.f1.zip › 8614160.f1/Supplemental tables_IJG_1815053.xlsx]

## Sheet: Table B1
Table B1. PCR confirmation of the assembled contigs from Newbler
Contig ID	Sequence length (bp)	Primer Number	Forward primer	Reverse primer	Expectied amplicon size (bp)	PCR product size (bp)	GenBank ID	Annotation, Definition
contig03919	141	1	AGCAATTAAATaATCATCTAGAAGCAG	TaTGCCAAcTGTCGGATTaCC	100	100
contig06316	149	2	TTTACTTTTGTTCTTTACGGTGCT	CGACCAGAGATTTCCACAAAG	111	111
contig01091	250	3	CGTCTGATTCTGAACTGCTTT	TGGGTCCATTCACAATTTCA	198	198
contig05889	280	4	AAGGTGGCAGCTGTGTCACT	TGATCAACaAGaAAAGCAATGaA	248	248
contig13046	363	5	CAACTGCAGCGCCTATCTTA	GGGCAAGAACAACAGAACCA	315	315
contig06525	326	6	AGAACGCAGCAGAATCAGGT	GAGGATACACCGGAACAAGC	264	264
contig13610	461	7	CGAGAGGAGCTTTCCTGAAG	GCATTCCTATTTCGCCTGAG	392	392	EF179617.1	Jatropha curcas acyl carrier protein (ACP) mRNA, complete cds
contig08199	542	8	TGAGCTTATGGGTGAAATGG	GATCCTTCCTTTCTCCacCAC	491	491	XM_002323498.1	Populus trichocarpa predicted protein, mRNA
contig27173	586	9	TTCACACCCGAACTCCTCTC	GCGATTGTAAGGCTGTTACCT	574	574
contig25368	810	10	TTCTTCGCTTCCTTAGCACTG	CCATCAAAAGaTACCCGATCTC	785	785	XM_002518485.1	Ricinus communis triptychon and cpc, putative, mRNA
contig04948	1437	11	TGCTATGGCTCCATTTGTTG	TCTCTCGGTAGCCTTTGGAG	1410	1410	XM_002521194.1	Ricinus communis WD-repeat protein, putative, mRNA
contig03257	1873	12	TGCTTAATATTGTGCTCATCTGG	AGGTTTTGCGAGAAGAATGG	1861	1861	XM_002531178.1	Ricinus communis DNA repair endonuclease xp-f / mei-9 / rad1, putative, mRNA
contig07520	2892	13	GCGCTCAAGAATTCCATCTT	TGCCATGCAGTGGATAGAAG	1899	1899	XM_002523154.1	Ricinus communis conserved hypothetical protein, mRNA
contig15391	3387	14	GAGATGGATGCTGCTtAGGG	CCACTCGCTTCGATGATTCT	1900	450	XM_002518474.1	Ricinus communis homeobox protein, putative, mRNA
		15	CATTGCAAGACCTTCAACCA	TATTGAGAGCCCCAATGGTC	1799	1799
contig05551	5313	16	TTGAGATGGCTGGTTCTCCT	CCGCGGATTATGCATCTAGT	1903	1903	XM_002526563.1	Ricinus communis mgatp-energized glutathione s-conjugate pump, putative, mRNA

## Sheet: Table B2
Table B2. List of SSR primers ordered for validation
Primer ID	SSR motif	Forward primer (5’->3’)	Forward primer (3’->5’)	Product size
JAT0001	(AC)13	TCCAATGGATGAGCAAATGA	GAATTGGCGATCTGGTTTGT	279
JAT0002	(AC)14	CCGAGTCAAAGAAAACAAAAACA	CAAGAACCATGGCCGTTAAT	192
JAT0003	(AC)18	TTGCTGGAAGGTTGATTTCC	TAACCAACGTAGTCCCCACC	218
JAT0004	(AC)19	TGGCTAACATTGGTTCTACCTG	TGGCTTGAATGGTTAAGTTTTTG	260
JAT0005	(GT)14	CTGTTCCATGGGGTACCAAG	CAAATCCATCACAACGTCCA	242
JAT0006	(TG)12	CCACAACCACACAGCCAATA	CTTTGGAGCCTGCAAGACAT	244
JAT0007	(TG)12	AGGCCACTGTTTGATTACCG	CCAAATTAGTCTTGCTTTCCTTG	256
JAT0008	(TG)13	GATTTTGCGGCATTTGAGAG	AAAGAAGGGTTTTTCCCTGG	140
JAT0009	(CA)9	AATCATCTTTTGCCTCCCCT	ATGGCAGGAAAGCTAAGCAA	184
JAT0010	(CA)10	GGAACCTTCCACATTTCTCTG	CCAACGCCTGTTTCATTTTT	213
JAT0011	(AG)15	GGGTTAGGGCTTGTAAGGGA	GGCGAATTCAATTTTGGGTA	188
JAT0012	(AG)20	AGAGTACTACGCGGCGAATG	ATGGTTACGGCTCCATCTCA	253
JAT0013	(AG)36	GCTTACATGCCTGCTCAACA	GCCTCCTTGCTCTTCCCTCT	145
JAT0014	(CT)18	AGGCTCTGGTCGCTTGATAA	GACGAAAGCCACAACCAAAC	209
JAT0015	(CT)19	GGAATCGCTGGTTTTTGTGT	GAAAGAGCCATGGAGGAAGA	266
JAT0016	(GA)16	TCCCTGTTCTGCTACGTCCT	CAACTCTTTTTCAAGAATACCCG	191
JAT0017	(GA)17	AACTAATCAAGCCCCACCCT	TATTGCGGTGGCTTATTTCC	162
JAT0018	(GA)21	AGCTCCTCGAACAAGCAAAA	TGCTTCGTCCGTCTCCTC	214
JAT0019	(TC)16	TCGTAACAAATACTCACTATCCCC	GATGGGTGAAAATGGTGGAG	116
JAT0020	(TC)18	CCCTACTAAGCCAATGCCAA	GCTTCAAAAGGGTAGCAGGA	218
JAT0021	(AT)11	ATCAGGCGTGTAGGGTTCTG	ATGTAGGGCAACTTAGCGGA	274
JAT0022	(AT)12	TCAGCCACATAGGAGTGCTTT	GGCAACCTTAACTCCATCTCA	158
JAT0023	(AT)13	TCTGGATCTGCTCAGTGGTG	TACTGGTGCCTGCCTCTTCT	251
JAT0024	(AT)14	CATGCCAGAAGATGCACAAT	GGAGCTCCTCTCTGTATGCC	252
JAT0025	(AT)15	GTGTGATCTTTCCCCGAAGA	TTGTGTCGTATATAGTGTAGCCAATG	215
JAT0026	(TA)12	AAGCTCGAACTTCCAGAGCA	GACAAACTACTTGGGGCCTG	247
JAT0027	(TA)14	TTTTTCCCCATACCCATCAA	CACCACCACCTATTACACAGCA	215
JAT0028	(TA)15	CATGTCCCGTCGGTAATAGG	TGGACGAGACGTGATCTTTG	160
JAT0029	(TA)16	TGAAACAGCCTGCCTTATGA	TTCCGCTGCTGACAAAATTA	161
JAT0030	(TA)19	GGGAATTCAAAGTCAAATGATAGA	CGGCCATAGCTAATGCAAAT	223
JAT0031	(GC)6	CGTTTTCCAAAGCTGGAGAG	ATACAAAATCGCACGCAGC	154
JAT0032	(AAC)7	TCAAGAGGCACCCACTTACC	AAATTACCGTGCTATTGCGG	223
JAT0033	(AAC)8	TTACCATTCACAAGGTGGCA	ACCATGAGAGGGGTTGTTGT	217
JAT0034	(AAC)12	AACTCCACCATCCTATCACCA	GCGTTCCAGTTGATGGTTTT	199
JAT0035	(GTT)6	TCTCCATAAACGCTTCCGTC	GGCGGATCTTCTGCTTGTAG	236
JAT0036	(GTT)7	TGACCCCAGAAATCACATCA	TTGCTTAGAGCTTCGCAACA	274
JAT0037	(CAA)10	GGGATCCAAATAAAGCAGCA	TTGTCGTGATTGTGGGTGTC	242
JAT0038	(CAA)6	CCAATAGCGCGAGGAGATAA	GCGGTGCTGTGTTGTTGTAG	166
JAT0039	(CAA)7	ACGCCAACTCACCACCTAAC	AAAGCAAAGCTGTGTTCTGG	175
JAT0040	(TTG)11	TCTTGAATGGAGAAATGGGC	CCCCTCTCTATTTTCCCCAG	275
JAT0041	(TTG)7	ATTTCACTTTGCCTGATGGG	ATTCACCCAATAGCCATCCA	123
JAT0042	(AAG)10	CCTGTGGCCCAAAAATTAGA	AGATTCGTTCTCATCCCCCT	190
JAT0043	(AAG)13	CTTCTCCATGTCCAAGCTCC	AGGCGAAGCACAATATCCAC	188
JAT0044	(AAG)14	TCCAAAATGAAGGTTGGGAC	TTGGAAAAGCATGAGAATGACT	280
JAT0045	(CTT)12	CAATTTACAAAACCACCTTCAGTT	AGAATCATGGGCAGTGAAGC	144
JAT0046	(CTT)14	TCCATGAAAAGTCGATCCCT	ACTTGATGCGGAGTTGGATT	208
JAT0047	(GAA)10	GAAGGAGAAGGGGAAGAGGA	GGCCCAAAGTTTCTTCACAA	208
JAT0048	(GAA)12	GAAAACCTTCAGCCGATGAG	CTGAAAGCATCTCTACCGCC	250
JAT0049	(GAA)12	GCAAGTAACAAAAAGGGCCA	CAGCACCAATTGAGTCTCCC	113
JAT0050	(TTC)11	TGCACCACTTACAGAGCTGG	TCCGAAACAGGAGGATTGTC	206
JAT0051	(TTC)13	TCTTATCAATGGCGTCCCTC	CTGGAATCGAACGGAGAGAG	255
JAT0052	(AAT)8	TCCAATTTACCCAATTCCCA	TAGGGAATCCATCATCTCGC	228
JAT0053	(AAT)11	GGATGGAAAAGGATTGGGAT	TCGAATTGTATTCGGGGTGT	214
JAT0054	(AAT)12	AAATCCTATGCCGTTTTCCC	ATAGCATAGCAATGGGTGGC	216
JAT0055	(ATT)10	GCTGGAGAGGAAGGGCTACT	TGCATGTCTGCACATTAGAGG	252
JAT0056	(ATT)9	GTCATGGCGCTCTAATGTCA	CATCCAAGGCTATTCCCAGA	189
JAT0057	(TAA)11	TCATATCCTGGTGGTGGGTT	GCGAAGACCCGTAGTAACCA	247
JAT0058	(TAA)8	GAGGCAAAAGGGAACCAAAT	GCATAGACCTGCTCAGCCAT	185
JAT0059	(TAA)8	CAATAGGTTAAAAGCACACCACA	TCCGACCTACCCATCAATTC	277
JAT0060	(TTA)11	GTGCCTGAAGTAAGGGCAAG	GTGAGAGGCACAGTTGCAGA	221
JAT0061	(TTA)9	GTGTGCCCCCTACAAACTGT	TAAAGGTCCTGCCTCCATTG	264
JAT0062	(ACA)5	TGGTGAGTTGGTCGTTTCAA	GGAAGACCCATCACCTTCAA	280
JAT0063	(ACA)5	GATCAGATTTAGGCCACGGA	TGCCGATTACTTTCCTCCAG	264
JAT0064	(ACA)6	AACGGCATTCTTGATTCCAC	TCTTCTCCACCAATTCCCAG	241
JAT0065	(ACA)7	ACCTGAATCAACGATCCTGC	TTGAAAAATCCTAGCCGCAC	241
JAT0066	(ACA)8	GCTCCTCCCTCCAATTCTTT	TTGTTGTTGTTGCTGGTGGT	211
JAT0067	(TGT)5	GCCCGTCCTTAGCCTACAAT	GAAGCCATAAAGTGACAGAAAAC	233
JAT0068	(TGT)5	CCAAAGGGTCTGAACTTGGA	ATTGAATTGTGGTGGTGGCT	257
JAT0069	(TGT)5	GAAGCTGCTCATTGACCCTC	CTACCCAACAACAGCAGCAG	201
JAT0070	(TGT)6	CCTCTGCCTCTTATGGCATT	CCACTCACAGGTGCATCATC	279
JAT0071	(TGT)7	TTGGATTGCTGAAGAAACAGT	AAATGTCTCTGGCCATCACC	130
JAT0072	(ACC)7	ACCACTACCATATCCCGCAC	TGGTGCTACTGGAGTTGGTG	231
JAT0073	(ACC)8	TTCTTAACCCAACCCCATCA	AACTCTTTCCTCTTGGCGGT	236
JAT0074	(ACC)9	AAGGCTCAAACGCTAAGCAA	GGCTCGCAGAAGAAAGACAC	185
JAT0075	(GGT)7	CGCTAGAGTCCCAATCGAAG	GTTCAGCTCACCTCTCCCAG	271
JAT0076	(GGT)8	CGGTTGAGATAAATGCCGAT	TCCCACTAAGCCTCCACAAC	131
JAT0077	(CCA)7	TGGAATTGAACAACGACCAG	GGAAGGAAGGAGGGAAGAGA	197
JAT0078	(CCA)9	GACTGCGACGTCTTGGAGAT	GGCGTGTGGAACTTTCTCAT	279
JAT0079	(TGG)7	TTTCCAGTGGGTCTGTCTCC	TAGCGTTATATCGGCGAACC	275
JAT0080	(TGG)10	GGAGGTACAGTCCCCCTTGT	CCCAAAAGAACAACTCACCC	271
JAT0081	(TGG)11	AATTGAAATGGCTAGCGCC	CAGCTGCGAATTTCAAAACA	173
JAT0082	(TCA)10	ATCTACAACCATTGGGCAGC	CATGTGCGGTCCTTTACCTT	199
JAT0083	(TCA)7	TCCATCATCTTGTCCCGATT	TTCGATTCTCTCACTGCCCT	242
JAT0084	(TCA)7	GCCCTTGAATGTCTCAGGAA	CACTGAGGAGGGAGGAGATG	202
JAT0085	(TCA)7	GTATCTTGCGTTTGGCCATT	AAAGATTCGAGTTGCAGGGA	245
JAT0086	(TCA)7	AGAGCCTCGGAGACATTTGA	TTGTCAGCTTGATGCTCCAC	177
JAT0087	(TCA)8	TCTTGGACCGAATTCTCCTG	CCATCCCTCACTGTTCCAAT	168
JAT0088	(TCA)8	ACTCAATTTTCGGCATCACC	CGAGTCTGCGAGTATAGGGC	253
JAT0089	(TCA)8	ACTCAATTTTCGGCATCACC	TGCTGATGAAGGGGATAAGG	114
JAT0090	(TGA)7	GCGGCCTCAAGTAATACTGC	CGCGACCATATGAACAACAC	144
JAT0091	(TGA)9	TGATCCAAACAACAAACCCA	CCTGCTCTTGCTCTTCCTTG	218
JAT0092	(AGA)8	GTGGAAGTGGGTCTCCTTCA	TGCTCATCATCAAGCAATCC	112
JAT0093	(AGA)9	ACTTAAGTTTCTGAACTGCGAGA	TAGGCCTCGGTTCTTTCCTT	162
JAT0094	(AGA)10	AACTAAGCATTGGTCGTGGG	AGATGCTTCCCCTGCTATTG	163
JAT0095	(AGA)11	CAGATAAGCATGAGCACCGA	GACGGATTGAAACATAGCCAA	143
JAT0096	(AGA)13	TGCAGAACCTTGTCTGCACT	GCAACCACCATTTTCCTAGC	209
JAT0097	(TCT)8	TTGATGCCCAGATTCATTCA	CCTTCAACGACACCAAGGTC	217
JAT0098	(TCT)11	GCTTGCCCAGAAAGAGACAG	CTCGGCAAGCTGAAGAAAAG	252
JAT0099	(TCT)12	CCGACAACCCATGTTTCTTT	AATGCACTGTTGCTTATGCG	260
JAT0100	(TCT)12	TTGCGTCAAAACAAAACCAC	ATGCGAAAGGGGTATTAGGG	188
JAT0101	(TCT)13	GGACGTAGGATCGGCTTGTA	GAGCTCATTGTAATGGAATTAGTCAA	154
JAT0102	(AGC)6	TGGTTCTCAAATTCCAAGGC	GGAGGTGCTGCTGCTAAAAG	118
JAT0103	(AGC)6	GGCATTTTGATGGAGCTTGT	TTCCATCCATTGGCAATTCT	263
JAT0104	(AGC)6	GGGAGCCTGGTGAGTATGAC	CTACTTCACCACCACCACCC	258
JAT0105	(AGC)7	TCTATCGTGGTGCTCATGGA	CCTGTTGGCTTCTCTCTTGG	193
JAT0106	(AGC)9	ACAAGGCGCTAGAACTGGAA	ATGATTGTGGCTCCAAAAGG	177
JAT0107	(GCT)6	GCAAGTCCATATGAATGCCA	TCTGCCAACAGCTTCATCAC	201
JAT0108	(GCT)7	CCCAGGAGCACCCAGTAATA	TGTGGCACTAATTGAGGCAG	178
JAT0109	(GCT)8	CCGTAAGCAGTTTCCTCTGC	GAATTGGAGCATTTGCGATT	169
JAT0110	(TCG)7	TCTCTGCCTATCCACAGAACC	TAATCTCTTGCGGCTGAGGT	171
JAT0111	(CGA)6	AAAACGCTCTCTCAAGCAGC	GTTGTCGTTTTGCTGGGAAT	241
JAT0112	(AGG)8	GACCTCTCCATTGGCAAAGA	TCACTCACTCAATCCTCGTCC	166
JAT0113	(AGG)9	ATCAATCCACCTCCCTTTCC	GAGGGGTAAGGTTCACCGAT	218
JAT0114	(AGG)9	GGACGAGGTTGAGGATGAAA	CTCCCCTCACAGCAGTTTGT	237
JAT0115	(CCT)7	TATGAAGGATGCTAGGGGGA	GTTGGAATTGGTCAAGCCAC	240
JAT0116	(CCT)8	CCCTTTCCCTTCTCAAAACC	ACCGAACCCAAATGATCTGA	197
JAT0117	(GGA)11	GTACCCAGTTGGCCAAAGAA	TCAAACACGGGTTCGTGTAA	112
JAT0118	(GGA)9	TCTTCTTCCTCGCGTTGAGT	CTTGAATGCCCAAAACCAGT	249
JAT0119	(GGA)9	TTGGACCCATGTGAGTTCTG	TTGTTACGTGGAAGTGCAGC	221
JAT0120	(TCC)7	TGCAGAGAAGCAAAAGGGTT	CACATCCTTGTCTTTGCCCT	253
JAT0121	(TCC)8	CGCCGCATCATTTGATAGTA	GCACAATTCTCCAGATGGCT	188
JAT0122	(ATA)9	GGCAGAGCCAAAATCAACAT	CACCATACTTTTTCTTCAACGG	266
JAT0123	(ATA)10	AAGAATGCCTTGCTCCAAAA	TGCTTCTTGCTAAGGTAGGCA	105
JAT0124	(ATA)10	GTGTGTCACCATGACCAAGC	TGGTAGGGAATCAGTTTGGG	183
JAT0125	(ATA)10	CGTGTGGCTTAGTGCCTGTA	TGATGCAACTGCAGCAATAC	203
JAT0126	(ATA)11	AACAAACATGCTCAGAAAGAAGG	GGATGCACAACAACAAGCAT	279
JAT0127	(TAT)11	TGGGTGGGTTTGTCATTTTT	CAATCCTTCTGATTTCCCCA	175
JAT0128	(TAT)7	AAGCAATTACCAAACGCCAC	GAGGGTATCCCCTTCTCTGC	155
JAT0129	(TAT)7	CAGCTCAAAGAACCGACCTT	CTTGACACCATGAGAGCGAA	112
JAT0130	(TAT)8	ATAGTTTGGGAATGGGAGGG	CAACGCGTTTTCCTGCTAAT	262
JAT0131	(TAT)8	CCTCATCTGCACTCTCACAAA	GCTGTTCATGGAGAGGAAGC	188
JAT0132	(ATC)8	AAAAAGCCTAAACCCACCGT	GCCAAGTGCTTGACCAGAA	255
JAT0133	(ATC)9	CACTTCCCTCTCAGGCAGAC	TCACTTCGAGCTCATCAGGA	278
JAT0134	(ATC)11	ACGTCATGTCGAAAGGGCTA	GCCCTAAACTCAAAAACCCA	176
JAT0135	(ATC)12	TGCTGGAGCATCAGGTTACA	ATGATAGCTCAGTCTTGCTGG	222
JAT0136	(GAT)8	TCCTTTCTCGGCGTCTCTAA	CTTTTGCAAGTCATGTGCGT	255
JAT0137	(GAT)10	TGGGTTGAAGATGATGGTGA	TTTCCTTCCTCGAGTTTCCA	248
JAT0138	(GAT)11	AGCAACAAGTGAGCTGCAAA	ATCCTTCAATCCCCGTTACC	278
JAT0139	(GAT)13	GACACCTCCAGCTCCTAACG	TCAACCTGAGCAACAAGTGC	261
JAT0140	(CTA)8	AAAAGAGAAAAGCGACAGCG	GAAAGGGAAACGGAAAAAGC	158
JAT0141	(TAG)5	CCTCCATGCTTTGAGTTGGT	ATGAGTTGGTTCGCCTTCAC	143
JAT0142	(ATG)7	CTCTAGCCCCGAAAATGACA	TCATGCAACTGATTGACCGT	200
JAT0143	(ATG)8	GCGGACAAGTTAGTTAGGCG	ATAGCTTAGGCAAGCAGGCA	271
JAT0144	(ATG)9	CGGTTATGGAGGATTTGGAA	GGAATCTGACCCACACCATC	202
JAT0145	(ATG)9	CGCCTTCTCAACATGGAGTT	ATTTTTGATTCCTCCACCCC	263
JAT0146	(CAT)7	GTGTCCACCCGATTTTTCAT	GGGCATGCACATAAGGAACT	193
JAT0147	(CAT)8	TGCTTTAATCACAAGATAATTGATG	CCCTTTTGAAGAATTTGAGGG	232
JAT0148	(GTA)9	ACCGTCAACAGGGCAATATC	CAATTGCTGTCCAAGACATGA	197
JAT0149	(TAC)7	TGGAGCCAACTACTTTTGGG	CATGACTTGTTGTTGCGACC	276
JAT0150	(TAC)8	ATTTCCATTTCTCCCATCCC	TTGCAGATTTCAGTTGCCTG	211
JAT0151	(TAC)9	CAGAAATTGCAATAGATCATGGA	AGAATGGGAGCCATGAAATG	132
JAT0152	(CAC)12	TTTGGAAAGAAGCCCTGATG	GGTGTCCCAGTGTTTTCGTT	211
JAT0153	(CAC)7	TCACTCACAGCCACCAAAAC	TGGGCTGTTGATGTTGAAAA	166
JAT0154	(CAC)7	AATATCACGGGGTCGCAATA	GAAAAAGTGGCAGTGGAGGA	271
JAT0155	(CAC)8	AAACAAACGCCCCAAACATA	GGAGGTAGTGCGTGGTGACT	101
JAT0156	(CAC)8	CTCTCTAAACCCTTGCAGGC	CCGATGGATAAGGAGCGTAA	255
JAT0157	(GTG)7	TTGCCGTTAGCGATCTTCTT	GTCTCTTCCGCATGTTCCAT	216
JAT0158	(GTG)7	ACAGGGAAGTTGCGTTTTTG	GCTTCTTCTTCTCGTCCTCTG	160
JAT0159	(GTG)7	TATACGTGGAGAGAAGGCGG	CTCTTTCGCTCCGTCAAATC	208
JAT0160	(GTG)7	TGCTACTGTTGCTTCATCGG	CACCACCGCCACTACTACCT	116
JAT0161	(GTG)9	GTGCGTTGGATGGAAAGAAT	CGCCCACTACCCACTAACTC	260
JAT0162	(CAG)12	CTGGCAAGGTCAGGGAATAA	TCTGCAGAGGCATCTGTGTC	244
JAT0163	(CAG)7	ATCTGCTTTACCCCTCGGAT	TGTGTTGGCATATTGGCAGT	222
JAT0164	(CAG)8	GGTATTGCGGTGGATAATGG	GATGTTGACGGTGATGTTGC	215
JAT0165	(CAG)9	CCTTTCACTCGAGGCTTGAC	GACCCTCTGGCTGAAGTTTG	204
JAT0166	(CTG)7	CATTTGGTTCTCTCTCCCCA	ACCCAGAGTTGATGCTTGCT	182
JAT0167	(CTG)7	AATGAACTTCCAAACAGGCG	GGTGCAATTATGGTTGCCTT	263
JAT0168	(CTG)7	TTTTTCGCTTCTTCCATGCT	TTCGAAATATTGGGCGAAGA	207
JAT0169	(CTG)8	ACACATGTGGAGAAGGAGGC	GCACATCAGGCCGATACTCT	269
JAT0170	(GAC)7	AGGGGAAGAGGTAAAGCTGC	CATAGTTCCTCGCTACCCGA	163
JAT0171	(GTC)7	TCTCCCAGATCCTCATCACC	GTCTTCATGCTTCGGAGGAG	248
JAT0172	(CCG)6	TTCCTATTCGCGGCATTATC	CCATTCCTTTCCTCCTCCTC	254
JAT0173	(CCG)6	GCGTGAAGAGGAGAGCATTC	AAATTCAATCGAAAGGTGCG	175
JAT0174	(CCG)8	GCCTTATTATGCTTGCTCGC	GTGGTCGTGACGGTAGAGGT	250
JAT0175	(CCG)8	TTACTATGCTTCCTCGCGGT	GTGGTCGTGACGGTAGAGGT	247
JAT0176	(CGG)5	ATCGTCCAAATGATCGGAAA	TAGTGTCGGGCTTAGACGGT	196
JAT0177	(CGG)8	TTCCCTGTTTTTGGAGTTGC	TCACTTGACGTAACCGGAGA	280
JAT0178	(GCC)5	CACAGCTCAAAACCCTAGCC	CTCCCGCTCAGATCCAGTAG	194
JAT0179	(GGC)6	GCCATAGTTCCGGCAGTAAA	ATAATGACCACAGCAAGGGC	273
JAT0180	(GGC)7	GAAGGTGTCGATGGAAAGGA	TTTTGGGCAAGGTCATCTTC	215
JAT0181	(GGC)9	TTGACGGGTTGAATCCAAAT	CTGTTTCCCCAATCACCACT	205
JAT0182	(CGC)5	CCACTTGGGCTTGATGAACT	CAAACCTGGCGATCTGTTTT	138
JAT0183	(CGC)5	TTCTGCCTTTGAAGTCCTCG	GGAATCGGAAAACCCAAAAT	238
JAT0184	(CGC)7	TGGCAATAAAATCAGCCACA	TTAATAATGATCGCCGGCTT	197
JAT0185	(GCG)5	AACCCTCCTACCGCTAATGG	TTGATGGTGATGAGGCATGT	243
JAT0186	(CTC)6	TGGGGAGGATCAAAGTGAAG	ATGTTAATGGCATTGGAGCC	260
JAT0187	(CTC)6	CCTCTGCTCCAAGTGCTACC	AGGCTCCGATGATGAAGATG	212
JAT0188	(CTC)7	TTTTTCCCATAATTTGCCCA	AAAAGCCTTCACACACCACC	213
JAT0189	(CTC)7	CCAGCAGCCATTTCTTCTTC	CTGCAGCACCAACTTCTTGA	156
JAT0190	(CTC)7	GGATATCCTTCGGCTCATCA	ATAACCTGGACCTGGCTGTG	225
JAT0191	(GAG)7	ACCGTAGGAGCCAGGAATTT	CATTACCATCAACATCGGCA	163
JAT0192	(GAG)8	TTAAGCTCAGGAGGCGTGTT	GGAACTTTCGCCATTTTTGA	223
JAT0193	(GAG)9	AAGAGCAAAAAGCGCAAGAG	CAGAATGGTCAGGCATCTCA	267
JAT0194	(GAG)9	GAAAGAGGCGAACAGTAGCG	GTTTCTTACGTCGCGTCCTC	249
JAT0195	(GAG)9	CAGTCAAGATAAGGGGCCAA	CCAACACAGACACCGTATGC	160
JAT0196	(GCA)7	AACAGCAACAATCACCCTCC	AATAAGCAGCAAGCAGCCAT	159
JAT0197	(GCA)7	ATTGGCGAAATGAGAACTGG	AGGCTGAAGCTGTTTTTCCA	186
JAT0198	(GCA)7	AGGCATAACTGCGAGATGCT	CCATTCTGTTGTTGTGGCTG	158
JAT0199	(GCA)7	AAACGGATTGCAAGAAGCAG	TGGGTAGCTTGATCCAAAGG	212
JAT0200	(GCA)7	TTTTGGTGATGGAGCTGTTG	GGTTTTATCTCACCGGGGTT	201
JAT0201	(TGC)7	GCTGTTGCTGCTGTGGATTA	ATAACCGGAATATGGGGCTC	219
JAT0202	(TGC)7	TCGTTCAGTTTGCTGACAGG	TGGAGGCTATCCTGGGTATG	267
JAT0203	(TGC)8	TTCACACGTTTCAGAGTCGAG	TGTGCAATCCATCCTCCATA	251
JAT0204	(TGC)9	TCTCGTGGCATCATTAGCAG	GGTGGTCTGTGTTTTGGGAC	275
JAT0205	(TGC)11	GTCGAAGTGCAGCCCATAAT	CCTCTCCATCACACCTCCAT	194

## Sheet: Table B3
Table B3. List of SNP primers ordered for validation
Primer ID	NO. SNPs	Forward primer (5’->3’)	Reverse primer (3’->5’)	Product size
JAT1001	5	GGGGCAGAAAATTCAAGTAATC	TGCATGCAATAGCAAGAAAGA	517
JAT1002	12	CGCTCAAACAAACAGAACAAA	TGTGAAATCTTGTGTTTTTGCAT	512
JAT1003	10	GCTCCTGAAGGCAAATCTGA	TGTTGAAAGCTTCCTTGAATCAT	534
JAT1004	16	TCACCGGATAGGCTACGAAC	GGAGAAGCGATGGTTTCAAG	503
JAT1005	44	CCATTGAGCCATTTGCTTG	GTCACCCTCGTTTCCCTGTA	519
JAT1006	23	CTCCCATTGCTTGCAATTCT	TTTGATGCCCACTTCACAAA	502
JAT1007	10	GGGGAACAAATAGGCTTTTCA	AAGAAAGTTGGCTGGTGCAT	513
JAT1008	19	CTTTCCTTGTGGCCTTGTCT	GCCAAGATGCTCGGTTAGAG	491
JAT1009	14	TGAAGGTACTGGAATGGTTGC	CGGGACTTACCGAAAATGTG	508
JAT1010	11	TGGTGATTGACACATCTGCTG	AAAACAGAATCCCCAAGCAA	484
JAT1011	6	CCTTGGCCATTTAGCCATAA	ATGATGAATGCCCCTGGATA	511
JAT1012	9	CCAGCTGGAGAACTGTCTCA	CACATTGCAAAGCACAATCC	480
JAT1013	12	TGAACATTGCCAAAGCACTC	GGTCCCATTGAGACAGGAAA	488
JAT1014	8	CCGTCACTAATTTCCTCATCG	GAGGATGTCTTCTCCAAGCAA	519
JAT1015	18	CTGGTTCATGACCTTGCACA	TTTCGCAGACGTCAGTTGTC	501
JAT1016	11	GCAGCAGCAGTGACAAGAAC	GGTTGTTGTTTCAAGGTCCAG	508
JAT1017	7	TGCTGCAGAGAGAGGGTATG	TCCTGATTTGCTACGGCTCT	442
JAT1018	9	CGCAAGATTGCTTCTCCAAT	AAAAGCATAAGATACAACCATAGCC	518
JAT1019	8	TTGCTGAAATTCCCGATCTC	AGCAAAGCTGGAGCTGGATA	502
JAT1020	6	CCATGGAAAACCTCACTGTGT	CCACCGTAAAATCACCTAATGAA	505
JAT1021	17	TCTTTCCGCGTTTTTCACTT	TTCTATGGGGCACTCCATTT	496

## Sheet: Table B4
Table B4. Annotation and size of the top 10 longest contigs in the UAS set
SN	Contig ID	Length (bp)	Genbank protein Hit GenBank ID	Function description	Length (aa)	Alignment regions to GenBank sequence accessions
1	contig14744	11929	XP_006377654.1	hypothetical protein POPTR_0011s09640g [Populus trichocarpa]	3755	293-11575
2	contig14745	11209	XP_002516857.1	conserved hypothetical protein [Ricinus communis]	3502	700-1587,1168-2022, 2953-3594, 3487-7974, 7944-10850, 10856-11086
3	contig14746	10859	XP_002527362.1	E3 ubiquitin protein ligase upl2, putative [Ricinus communis]	3666	1-690, 684-10673
4	contig01532	9848	Multiple	Multiple proteins		Narrow ranges
5	contig00611	8801	YP_002720155.1	ycf2 [Jatropha curcas]	2298	892-948, 930-1271, 1213-4683, 4674-5900, 5882-7783
6	contig06115	8504	YP_002720170.1	ycf1 [Jatropha curcas]	1907	244-1800, 1788-2597, 2678-3235, 3235-4317, 4299-5180, 5168-5959,
7	contig14747	8184	YP_002720119.1	atpB [Jatropha curcas]	495	4873-6348
8	contig14748	8072	XP_002515700.1	huntingtin interacting protein, putative [Ricinus communis]	2430	377-3175, 3160-7332, 7651-7725
9	contig05506	7967	XP_002324946.2	hypothetical protein POPTR_0018s03440g [Populus trichocarpa]	2804	2254-4998, 5000-6433, 6387-7652, 7651-7962, 6387-6620
10	contig14749	7778	XP_002522017.1	Translational activator GCN1, putative [Ricinus communis]	2459	568-7695, 7691-7777

## Sheet: Table B5
Table B5. Number of UASs aligned with protein and nucleotide sequences in Arabidopsis, castor bean and cassava
	A. thaliana		Castor bean		Cassava
	Protein	Nucleotide	Protein	Nucleotide	Protein	Nucleotide
No. of hit	69882	32398	77145	76322	77663	78281
Percentage	0.604	0.28	0.667	0.66	0.672	0.677

## Sheet: Table B6
Table B6. Number of UAS annotated involved in KEGG pathways
Pathway categories		#KO	#UAS
1. Metabolism		1798	3135
1.0 Global map		238	439
Carbon metabolism	map01200	81	165
2-Oxocarboxylic acid metabolism	map01210	29	39
Fatty acid metabolism	map01212	27	51
Biosynthesis of amino acids	map01230	98	178
Degradation of aromatic compounds	map01220	3	6
1.1 Carbohydrate metabolism		284	628
Glycolysis / Gluconeogenesis	map00010	29	80
Citrate cycle (TCA cycle)	map00020	18	34
Pentose phosphate pathway	map00030	16	38
Pentose and glucuronate interconversions	map00040	11	34
Fructose and mannose metabolism	map00051	17	36
Galactose metabolism	map00052	15	35
Ascorbate and aldarate metabolism	map00053	14	26
Starch and sucrose metabolism	map00500	29	95
Amino sugar and nucleotide sugar metabolism	map00520	37	76
Pyruvate metabolism	map00620	30	60
Glyoxylate and dicarboxylate metabolism	map00630	21	38
Propanoate metabolism	map00640	14	23
Butanoate metabolism	map00650	10	14
C5-Branched dibasic acid metabolism	map00660	4	4
Inositol phosphate metabolism	map00562	19	35
1.2 Energy metabolism		214	362
Oxidative phosphorylation	map00190	81	121
Photosynthesis	map00195	39	59
Photosynthesis	map00195	39	59
Photosynthesis - antenna proteins	map00196	12	16
Carbon fixation in photosynthetic organisms	map00710	24	50
Carbon fixation pathways in prokaryotes	map00720	13	22
Methane metabolism	map00680	19	47
Nitrogen metabolism	map00910	12	21
Sulfur metabolism	map00920	14	26
1.3 Lipid metabolism		176	288
Fatty acid biosynthesis	map00061	13	23
Fatty acid elongation	map00062	7	12
Fatty acid degradation	map00071	10	28
Synthesis and degradation of ketone bodies	map00072	3	5
Cutin, suberine and wax biosynthesis	map00073	5	6
Steroid biosynthesis	map00100	18	19
Steroid hormone biosynthesis	map00140	2	2
Glycerolipid metabolism	map00561	23	38
Glycerophospholipid metabolism	map00564	37	59
Ether lipid metabolism	map00565	8	14
Sphingolipid metabolism	map00600	15	22
Arachidonic acid metabolism	map00590	6	10
Linoleic acid metabolism	map00591	4	6
alpha-Linolenic acid metabolism	map00592	13	21
Biosynthesis of unsaturated fatty acids	map01040	12	23
1.4 Nucleotide metabolism		161	223
Purine metabolism	map00230	86	125
Pyrimidine metabolism	map00240	75	98
1.5 Amino acid metabolism		247	407
Alanine, aspartate and glutamate metabolism	map00250	27	34
Glycine, serine and threonine metabolism	map00260	31	50
Cysteine and methionine metabolism	map00270	32	58
Valine, leucine and isoleucine degradation	map00280	19	33
Valine, leucine and isoleucine biosynthesis	map00290	10	13
Lysine biosynthesis	map00300	9	11
Lysine degradation	map00310	9	17
Arginine and proline metabolism	map00330	37	59
Histidine metabolism	map00340	11	15
Tyrosine metabolism	map00350	15	24
Phenylalanine metabolism	map00360	15	41
Tryptophan metabolism	map00380	9	15
Phenylalanine, tyrosine and tryptophan biosynthesis	map00400	23	37
1.6 Metabolism of other amino acids		57	128
beta-Alanine metabolism	map00410	16	28
Taurine and hypotaurine metabolism	map00430	3	7
Phosphonate and phosphinate metabolism	map00440	3	5
Selenocompound metabolism	map00450	9	13
Cyanoamino acid metabolism	map00460	8	19
D-Glutamine and D-glutamate metabolism	map00471	1	2
Glutathione metabolism	map00480	17	54
1.7 Glycan biosynthesis and metabolism		103	136
N-Glycan biosynthesis	map00510	32	41
Other glycan degradation	map00511	9	14
Various types of N-glycan biosynthesis	map00513	22	26
Other types of O-glycan biosynthesis	map00514	2	2
Glycosaminoglycan degradation	map00531	4	7
Glycosylphosphatidylinositol (GPI)-anchor biosynthesis	map00563	21	26
Glycosphingolipid biosynthesis - globo series	map00603	3	8
Glycosphingolipid biosynthesis - ganglio series	map00604	2	4
Lipopolysaccharide biosynthesis	map00540	6	6
Peptidoglycan biosynthesis	map00550	2	2
1.8 Metabolism of cofactors and vitamins		129	185
Thiamine metabolism	map00730	8	10
Riboflavin metabolism	map00740	5	7
Vitamin B6 metabolism	map00750	7	11
Nicotinate and nicotinamide metabolism	map00760	11	14
Pantothenate and CoA biosynthesis	map00770	16	23
Biotin metabolism	map00780	8	15
Lipoic acid metabolism	map00785	2	4
Folate biosynthesis	map00790	10	15
One carbon pool by folate	map00670	10	17
Retinol metabolism	map00830	4	7
Porphyrin and chlorophyll metabolism	map00860	30	38
Ubiquinone and other terpenoid-quinone biosynthesis	map00130	18	24
1.9 Metabolism of terpenoids and polyketides		79	108
Terpenoid backbone biosynthesis	map00900	29	41
Monoterpenoid biosynthesis	map00902	2	2
Sesquiterpenoid and triterpenoid biosynthesis	map00909	5	6
Diterpenoid biosynthesis	map00904	8	9
Carotenoid biosynthesis	map00906	16	19
Brassinosteroid biosynthesis	map00905	6	6
Zeatin biosynthesis	map00908	4	9
Limonene and pinene degradation	map00903	2	7
Geraniol degradation	map00281	1	2
Biosynthesis of ansamycins	map01051	1	1
Tetracycline biosynthesis	map00253	3	4
Polyketide sugar unit biosynthesis	map00523	1	1
Biosynthesis of siderophore group nonribosomal peptides	map01053	1	1
1.10 Biosynthesis of other secondary metabolites		68	127
Phenylpropanoid biosynthesis	map00940	15	47
Stilbenoid, diarylheptanoid and gingerol biosynthesis	map00945	6	10
Flavonoid biosynthesis	map00941	14	18
Flavone and flavonol biosynthesis	map00944	4	5
Anthocyanin biosynthesis	map00942	1	1
Isoquinoline alkaloid biosynthesis	map00950	7	12
Tropane, piperidine and pyridine alkaloid biosynthesis	map00960	8	15
Caffeine metabolism	map00232	2	2
Betalain biosynthesis	map00965	1	1
Glucosinolate biosynthesis	map00966	2	2
Streptomycin biosynthesis	map00521	4	7
Butirosin and neomycin biosynthesis	map00524	1	3
Novobiocin biosynthesis	map00401	2	3
Aflatoxin biosynthesis	map00254	1	1
1.11 Xenobiotics biodegradation and metabolism		43	104
Benzoate degradation	map00362	3	5
Aminobenzoate degradation	map00627	3	5
Fluorobenzoate degradation	map00364	1	1
Chlorocyclohexane and chlorobenzene degradation	map00361	2	2
Chloroalkane and chloroalkene degradation	map00625	3	9
Toluene degradation	map00623	1	1
Styrene degradation	map00643	3	4
1,1,1-Trichloro-2,2-bis(4-chlorophenyl)ethane (DDT) degradation	map00351	1	1
Bisphenol degradation	map00363	1	3
Naphthalene degradation	map00626	2	5
Polycyclic aromatic hydrocarbon degradation	map00624	3	5
Metabolism of xenobiotics by cytochrome P450	map00980	4	25
Drug metabolism - cytochrome P450	map00982	4	25
Drug metabolism - other enzymes	map00983	12	13
2. Genetic Information Processing		963	1621
2.1 Transcription		164	245
RNA polymerase	map03020	30	38
Basal transcription factors	map03022	31	40
Spliceosome	map03040	103	167
2.2 Translation		347	598
Ribosome	map03010	121	269
Aminoacyl-tRNA biosynthesis	map00970	26	47
RNA transport	map03013	94	123
mRNA surveillance pathway	map03015	50	90
Ribosome biogenesis in eukaryotes	map03008	56	69
2.3 Folding, sorting and degradation		269	495
Protein export	map03060	26	53
Protein processing in endoplasmic reticulum	map04141	76	164
SNARE interactions in vesicular transport	map04130	18	31
Ubiquitin mediated proteolysis	map04120	57	97
Sulfur relay system	map04122	9	13
Proteasome	map03050	34	46
RNA degradation	map03018	49	91
2.4 Replication and repair		183	283
DNA replication	map03030	32	43
Base excision repair	map03410	27	39
Nucleotide excision repair	map03420	37	51
Mismatch repair	map03430	21	35
Homologous recombination	map03440	26	46
Non-homologous end-joining	map03450	8	8
Fanconi anemia pathway	map03460	32	61
3. Environmental Information Processing		244	657
3.1 Membrane transport		9	22
ABC transporters	map02010	3	10
Bacterial secretion system	map03070	6	12
3.2 Signal transduction		234	634
Two-component system	map02020	9	14
Ras signaling pathway	map04014	10	26
Rap1 signaling pathway	map04015	5	21
MAPK signaling pathway	map04010	8	27
MAPK signaling pathway - fly	map04013	2	7
MAPK signaling pathway - yeast	map04011	2	5
ErbB signaling pathway	map04012	5	12
Wnt signaling pathway	map04310	14	38
Notch signaling pathway	map04330	7	10
Hedgehog signaling pathway	map04340	3	5
TGF-beta signaling pathway	map04350	10	22
Hippo signaling pathway	map04390	7	21
Hippo signaling pathway - fly	map04391	6	15
VEGF signaling pathway	map04370	5	20
Jak-STAT signaling pathway	map04630	2	2
NF-kappa B signaling pathway	map04064	5	10
TNF signaling pathway	map04668	4	10
HIF-1 signaling pathway	map04066	15	37
FoxO signaling pathway	map04068	17	38
Calcium signaling pathway	map04020	7	17
Phosphatidylinositol signaling system	map04070	16	30
PI3K-Akt signaling pathway	map04151	23	59
mTOR signaling pathway	map04150	12	25
Plant hormone signal transduction	map04075	40	163
3.3 Signaling molecules and interaction		1	1
Neuroactive ligand-receptor interaction	map04080	1	1
4. Cellular Processes		392	734
4.1 Transport and catabolism		145	263
Endocytosis	map04144	36	62
Phagosome	map04145	27	71
Lysosome	map04142	33	47
Peroxisome	map04146	34	61
Regulation of autophagy	map04140	15	22
4.2 Cell motility		18	51
Regulation of actin cytoskeleton	map04810	18	51
4.3 Cell growth and death		202	338
Cell cycle	map04110	59	88
Cell cycle - yeast	map04111	52	71
Cell cycle - Caulobacter	map04112	5	14
Meiosis - yeast	map04113	39	58
Oocyte meiosis	map04114	31	68
Apoptosis	map04210	4	11
p53 signaling pathway	map04115	12	28
4.4 Cell communication		27	82
Focal adhesion	map04510	7	25
Adherens junction	map04520	6	19
Tight junction	map04530	10	20
Gap junction	map04540	4	18
5. Organismal Systems		412	1038
5.1 Immune system		80	226
Platelet activation	map04611	2	10
Toll-like receptor signaling pathway	map04620	4	17
NOD-like receptor signaling pathway	map04621	4	12
RIG-I-like receptor signaling pathway	map04622	6	9
Cytosolic DNA-sensing pathway	map04623	16	20
Natural killer cell mediated cytotoxicity	map04650	4	19
Antigen processing and presentation	map04612	10	25
T cell receptor signaling pathway	map04660	5	15
B cell receptor signaling pathway	map04662	5	21
Fc epsilon RI signaling pathway	map04664	4	15
Fc gamma R-mediated phagocytosis	map04666	14	39
Leukocyte transendothelial migration	map04670	1	7
Chemokine signaling pathway	map04062	5	17
5.2 Endocrine system		108	248
Insulin secretion	map04911	1	1
Insulin signaling pathway	map04910	19	48
Adipocytokine signaling pathway	map04920	6	14
PPAR signaling pathway	map03320	9	24
GnRH signaling pathway	map04912	4	13
Estrogen signaling pathway	map04915	7	19
Progesterone-mediated oocyte maturation	map04914	22	40
Prolactin signaling pathway	map04917	4	10
Oxytocin signaling pathway	map04921	9	24
Thyroid hormone synthesis	map04918	5	13
Thyroid hormone signaling pathway	map04919	16	29
Melanogenesis	map04916	5	12
Renin-angiotensin system	map04614	1	1
5.3 Circulatory system		25	59
Cardiac muscle contraction	map04260	12	18
Adrenergic signaling in cardiomyocytes	map04261	8	26
Vascular smooth muscle contraction	map04270	5	15
5.4 Digestive system		24	60
Salivary secretion	map04970	1	2
Gastric acid secretion	map04971	1	2
Pancreatic secretion	map04972	5	16
Bile secretion	map04976	2	11
Carbohydrate digestion and absorption	map04973	1	3
Protein digestion and absorption	map04974	3	7
Fat digestion and absorption	map04975	4	5
Vitamin digestion and absorption	map04977	1	1
Mineral absorption	map04978	6	13
5.5 Excretory system		25	51
Vasopressin-regulated water reabsorption	map04962	5	15
Aldosterone-regulated sodium reabsorption	map04960	2	6
Endocrine and other factor-regulated calcium reabsorption	map04961	6	11
Proximal tubule bicarbonate reclamation	map04964	2	3
Collecting duct acid secretion	map04966	10	16
5.6 Nervous system		75	189
Glutamatergic synapse	map04724	6	20
GABAergic synapse	map04727	8	19
Cholinergic synapse	map04725	3	8
Dopaminergic synapse	map04728	9	24
Serotonergic synapse	map04726	3	8
Long-term potentiation	map04720	6	20
Long-term depression	map04730	4	13
Retrograde endocannabinoid signaling	map04723	3	9
Synaptic vesicle cycle	map04721	23	36
Neurotrophin signaling pathway	map04722	10	32
5.7 Sensory system		7	15
Phototransduction	map04744	2	3
Phototransduction - fly	map04745	1	2
Olfactory transduction	map04740	1	2
Taste transduction	map04742	1	1
Inflammatory mediator regulation of TRP channels	map04750	2	7
5.8 Development		11	53
Dorso-ventral axis formation	map04320	2	7
Axon guidance	map04360	5	27
Osteoclast differentiation	map04380	4	19
5.9 Environmental adaptation		57	137
Plant-pathogen interaction	map04626	28	90
Circadian rhythm	map04710	6	10
Circadian rhythm - fly	map04711	1	2
Circadian rhythm - plant	map04712	19	27
Circadian entrainment	map04713	3	8
6. Human Diseases		782	1637
6.1 Cancers: Overview		101	249
Pathways in cancer	map05200	26	50
Transcriptional misregulation in cancer	map05202	10	22
Viral carcinogenesis	map05203	39	93
Chemical carcinogenesis	map05204	3	23
Proteoglycans in cancer	map05205	9	31
MicroRNAs in cancer	map05206	14	30
6.2 Cancers: Specific types		77	190
Colorectal cancer	map05210	9	24
Renal cell carcinoma	map05211	7	19
Pancreatic cancer	map05212	6	18
Endometrial cancer	map05213	6	15
Glioma	map05214	6	15
Prostate cancer	map05215	11	23
Thyroid cancer	map05216	3	8
Basal cell carcinoma	map05217	2	3
Melanoma	map05218	4	12
Bladder cancer	map05219	3	9
Chronic myeloid leukemia	map05220	4	12
Acute myeloid leukemia	map05221	4	10
Small cell lung cancer	map05222	7	11
Non-small cell lung cancer	map05223	5	11
6.3 Immune diseases		22	71
Systemic lupus erythematosus	map05322	8	50
Rheumatoid arthritis	map05323	12	19
Primary immunodeficiency	map05340	2	2
6.4 Neurodegenerative diseases		199	316
Alzheimer's disease	map05010	58	90
Parkinson's disease	map05012	58	83
Amyotrophic lateral sclerosis (ALS)	map05014	7	23
Huntington's disease	map05016	71	106
Prion diseases	map05020	5	14
6.5 Substance dependence		20	86
Amphetamine addiction	map05031	3	12
Morphine addiction	map05032	2	4
Nicotine addiction	map05033	1	3
Alcoholism	map05034	14	67
6.6 Cardiovascular diseases		5	14
Hypertrophic cardiomyopathy (HCM)	map05410	2	3
Viral myocarditis	map05416	3	11
6.7 Endocrine and metabolic diseases		50	91
Type I diabetes mellitus	map04940	2	5
Type II diabetes mellitus	map04930	4	18
Non-alcoholic fatty liver disease (NAFLD)	map04932	44	68
6.8 Infectious diseases: Bacterial		103	254
Bacterial invasion of epithelial cells	map05100	9	17
Vibrio cholerae infection	map05110	18	41
Epithelial cell signaling in Helicobacter pylori infection	map05120	13	26
Pathogenic Escherichia coli infection	map05130	8	19
Shigellosis	map05131	11	28
Salmonella infection	map05132	9	27
Pertussis	map05133	4	18
Legionellosis	map05134	12	30
Tuberculosis	map05152	19	48
6.9 Infectious diseases: Viral		182	302
HTLV-I infection	map05166	41	59
Measles	map05162	11	23
Influenza A	map05164	18	34
Hepatitis B	map05161	12	19
Hepatitis C	map05160	10	19
Herpes simplex infection	map05168	28	51
Epstein-Barr virus infection	map05169	62	97
6.10 Infectious diseases: Parasitic		23	64
Toxoplasmosis	map05145	6	26
Leishmaniasis	map05140	3	9
Chagas disease (American trypanosomiasis)	map05142	7	18
African trypanosomiasis	map05143	3	3
Amoebiasis	map05146	4	8
Total #		4592	8822

## Sheet: Table B7
Table B7. Thirty selected cold stress regulated genes.
Gene	Species	Locus	NCBI ID	Protein
HOS15	A. thaliana	AT5G67320	gi|332010945	Histone deacetylation-related WD-40 repeat protein
HOS1	A. thaliana	AT2G39810	gi|330254640	E3 ubiquitin-protein ligase HOS1
HOS9	A. thaliana	AT2G01500	gi|330250367	Homeodomain transcription factor PFS2
HOS10	A. thaliana	AT1G35515	gi|332193682	R2R3-type MYB transcription factor
ICE1	A. thaliana	AT3G26744	gi|332643689	Transcription factor ICE1
ICE2	A. thaliana	AT1G12860	gi|332190819	Transcription factor SCREAM2
CBF1	A. thaliana	AT4G25490	gi|332659666	Dehydration-responsive element-binding protein 1B
CBF2	A. thaliana	AT4G25470	gi|332659664	Dehydration-responsive element-binding protein 1C
CBF3 /DREB1A	A. thaliana	AT4G25480	gi|332659665	Dehydration-responsive element-binding protein 1A
CBF4	A. thaliana	AT5G51990	gi|332008773	Dehydration-responsive element-binding protein 1D
OsMYB4	Oryza sativa	D88620	gi|2605623	OSMYB4
MYB15	A. thaliana	AT3G23250	gi|332643220	MYB domain protein 15
SFR6	A. thaliana	AT4G04920	gi|332657042	Mediator of RNA polymerase II transcription subunit 16
LOS2	A. thaliana	AT2G36530	gi|15227987	Bifunctional enolase 2/transcriptional activator
ZAT10/STZ	A. thaliana	AT1G27730	gi|332192749	Zinc finger protein STZ/ZAT10
ZAT12	A. thaliana	AT5G59820	gi|332009854	High light responsive zinc finger protein ZAT12
SCOF-1	Glycine max	GMU68763	gi|1763063	SCOF-1
ESK1	A. thaliana	AT3G55990	gi|332645943	Uncharacterized protein AT3G55990
RAV1	A. thaliana	AT1G13260	gi|332190870	AP2/ERF and B3 domain-containing transcription factor RAV1
Hv-WRKY38	Hordeum vulgare	AY541586	gi|44893902	WRKY transcription factor
CAS18	Medicago falcata	ALFCAS18A	gi|532968	Cold acclimation-specific protein
KIN1	A. thaliana	AT5G15960	gi|332004847	Cold and ABA inducible protein kin1
COR6.6 /KIN2	A. thaliana	AT5G15970	gi|332004848	Stress-induced protein KIN2
COR15a	A. thaliana	AT2G42540	gi|330255042	Cold-regulated protein 15a
COR47	A. thaliana	AT1G20440	gi|15217937	Dehydrin COR47
Rd29a/LTI78/COR78	A. thaliana	AT5G52310	gi|332008816	Low-temperature-responsive protein 78/desiccation-responsive protein 29A
ANAC072 /Rd26	A. thaliana	AT4G27410	gi|332659935	NAC transcription factor RD26
Rd22	A. thaliana	AT5G25610	gi|332006089	Dehydration-responsive protein RD22
RAP2.1	A. thaliana	AT1G46768	gi|332194008	Ethylene-responsive transcription factor RAP2-1
RAP2.7	A. thaliana	AT2G28550	gi|330253045	TARGET OF EARLY ACTIVATION TAGGED 1

## Sheet: Table B8
Table B8. SSR motif types and numbers detected in the jatropha 454 databases.
Repeat motif	Number of repeat motifs												Total repeat
	5	6	7	8	9	10	11	12	13	14	15	>15	No.	%
AT/AT	884	277	151	88	75	53	34	27	22	12	14	30	1667	17
AG/CT	2149	597	273	286	208	199	179	143	94	74	80	206	4488	45.8
AC/GT	316	65	36	25	15	11	8	8	5	8		11	508	5.2
GC/GC	3	1	1										5	0.1
AAT/ATT	141	77	62	25	17	8	8	8	1				347	3.5
AAG/CTT	381	188	81	69	46	18	17	10	3	4	1		818	8.3
AAC/GTT	55	38	19	6	3	1	1						123	1.3
ATA/TAT	43	24	13	8	4	6	5				1		104	1.1
ATG/CAT	62	24	14	9	6	1	1						117	1.2
ATC/GAT	85	33	12	14			2	1	2				149	1.5
AGA/TCT	175	110	45	54	19	11	5	6	3			1	429	4.4
AGG/CCT	69	30	28	19	7		2						155	1.6
AGC/GCT	46	15	11	2	3	1							78	0.8
ACA/TGT	13	6	2	1		1	1						24	0.2
ACT/AGT	80	31	14	7	4	4							140	1.4
ACG/CGT	48	33	14	4			1						100	1
ACC/GGT	69	32	24	4	3	1	1						134	1.4
GAG/CTC	57	14	6	3	4								84	0.9
GAC/GTC	44	23	17	7	4		1						96	1
GTG/CAC	34	28	15	3	1			1					82	0.8
GGC/GCC	40	13	2	8	1								64	0.7
GCG/CGC	2		1										3	0
AAAG/CTTT	5	8	1										14	0.1
AATA/TATT	8												8	0.1
AAGG/CCTT	1	1											2	0
ATAC/GTAT	1												1	0
ATCA/TGAT	1												1	0
ATTA/TAAT	2	1											3	0
TAAA/TTTA	3												3	0
TAAC/GTTA			1										1	0
TATC/GATA	1					1							2	0
TTGG/GGTT	1	1											2	0
TGAG/CTCA	1												1	0
TCAC/GTGA	3												3	0
GTTG/CAAC		1											1	0
GACC/GGTC	1												1	0
GAGC/GCTC	1												1	0
CAAG/CTTG	1												1	0
AAGG/CCTT	1												1	0
CTTTC/GAAAG	2												2	0
AAAAG/CTTTT		1			1								2	0
AAAAC/GTTTT		2											2	0
TAAAA/TTTTA	1												1	0
AAATA/TATTT		1											1	0
TCTCC/GGAGA	1												1	0
GTGGCG/CGCCAC	4												4	0
CGGTGG/CCACCG	1												1	0
GTGCAG/CTGCAC		1											1	0
CTTTTC/GAAAAG	2												2	0
AAAAAG/CTTTTT	1												1	0
GAAGAT/ATCTTC	3												3	0
AAGGTC/GACCTT	1												1	0
GAGAGG/CCTCTC	2												2	0
AGGCTC/GAGCCT	1												1	0
AGCCTC/GAGGCT	1												1	0
AGAGGC/GCCTCT	2												2	0
GGACAA/CCTGTT	1												1	0
GGCTGC/GCAGCC		1											1	0
ATCACC/GGTGAT	1												1	0
AGCCAC/GTGGCT	2												2	0
TATGGG/CCCATA	1												1	0
TCAAGG/CCTTGA	1												1	0
TCAGGC/GCCTGA	2												2	0
AGATGA/TCATCT	1												1	0
Total	4858	1677	843	642	421	316	266	204	130	98	96	248	9799

## Sheet: Table B9
Table B9. Details of validated SNPs.
Primer	Contig	Expected SNPs	Validated SNPs	Ref	ALT	Position	Depth
JAT1007	contig19411	10	5	A	G	623	29
				G	T	647	16
				T	C	650	16
				T	C	659	16
				A	G	661	16
JAT1012	contig08432	9	8	G	A	618	4
				A	G	627	4
				C	A	655	4
				C	T	691	4
				C	T	695	4
				T	G	701	4
				G	T	716	4
				C	A	740	4
JAT1017	contig09185	7	4	C	A	876	16
				C	A	880	16
				A	T	885	16
				A	G	916	16
JAT1018	contig25485	9	8	C	T	258	304
				T	A	291	297
				C	T	316	311
				C	G	363	318
				A	G	374	318
				T	C	432	305
				G	A	491	289
				A	T	505	256
JAT1020	contig25180	6	3	G	T	394	40
				G	C	418	38
				A	C	493	35

## Sheet: Tabel B10
Table B10. Ten selected J. curcas UASs involved in human disease related pathways by KEGG pathway mapping.
UAS ID	KO	Definition	#	Pathways ID Name
contig09182	K03136	Transcription initiation factor TFIIE subunit alpha	3	ko03022 Basal transcription factors
				ko05169 Epstein-Barr virus infection
				ko05203 Viral carcinogenesis
contig18627	K06620	Transcription factor E2F3	13	ko04110 Cell cycle
				ko05161 Hepatitis B
				ko05166 HTLV-I infection
				ko05200 Pathways in cancer
				ko05206 MicroRNAs in cancer
				ko05212 Pancreatic cancer
				ko05214 Glioma
				ko05215 Prostate cancer
				ko05218 Melanoma
				ko05219 Bladder cancer
				ko05220 Chronic myeloid leukemia
				ko05222 Small cell lung cancer
				ko05223 Non-small cell lung cancer
contig16722	K02145	V-type proton ATPase catalytic subunit A	7	ko00190 Oxidative phosphorylation
				ko04145 Phagosome
				ko04721 Synaptic vesicle cycle
				ko04966 Collecting duct acid secretion
				ko05110 Vibrio cholerae infection
				ko05120 Epithelial cell signaling in Helicobacter pylori infection
				ko05323 Rheumatoid arthritis
contig11382	K03120	Transcription initiation factor TFIID TATA-box-binding protein	6	ko03022 Basal transcription factors
				ko05016 Huntington's disease
				ko05166 HTLV-I infection
				ko05168 Herpes simplex infection
				ko05169 Epstein-Barr virus infection
				ko05203 Viral carcinogenesis
contig12218	K04392	Ras-related C3 botulinum toxin substrate 1	34	ko04010 MAPK signaling pathway
				ko04014 Ras signaling pathway
				ko04015 Rap1 signaling pathway
				ko04062 Chemokine signaling pathway
				ko04145 Phagosome
				ko04151 PI3K-Akt signaling pathway
				ko04310 Wnt signaling pathway
				ko04360 Axon guidance
				ko04370 VEGF signaling pathway
				ko04380 Osteoclast differentiation
				ko04510 Focal adhesion
				ko04520 Adherens junction
				ko04620 Toll-like receptor signaling pathway
				ko04650 Natural killer cell mediated cytotoxicity
				ko04662 B cell receptor signaling pathway
				ko04664 Fc epsilon RI signaling pathway
				ko04666 Fc gamma R-mediated phagocytosis
				ko04670 Leukocyte transendothelial migration
contig12218	K04392	Ras-related C3 botulinum toxin substrate 1	34	ko04722 Neurotrophin signaling pathway
				ko04810 Regulation of actin cytoskeleton
				ko04932 Non-alcoholic fatty liver disease (NAFLD)
				ko04972 Pancreatic secretion
				ko05014 Amyotrophic lateral sclerosis
				ko05100 Bacterial invasion of epithelial cells
				ko05120 Epithelial cell signaling in Helicobacter pylori infection
				ko05131 Shigellosis
				ko05132 Salmonella infection
				ko05200 Pathways in cancer
				ko05203 Viral carcinogenesis
				ko05205 Proteoglycans in cancer
				ko05210 Colorectal cancer
				ko05211 Renal cell carcinoma
				ko05212 Pancreatic cancer
				ko05416 Viral myocarditis
contig18284	K10956	protein transport protein SEC61 subunit alpha	4	ko03060 Protein export
				ko04141 Protein processing in endoplasmic reticulum
				ko04145 Phagosome
				ko05110 Vibrio cholerae infection
contig16190	K00615	transketolase	5	ko00030 Pentose phosphate pathway
				ko00710 Carbon fixation in photosynthetic organisms
				ko01051 Biosynthesis of ansamycins
				ko01200 Carbon metabolism
				ko01230 Biosynthesis of amino acids
contig09525	K06269	Serine/threonine-protein phosphatase PP1 catalytic subunit	18	ko03015 mRNA surveillance pathway
				ko04113 Meiosis - yeast
				ko04114 Oocyte meiosis
				ko04261 Adrenergic signaling in cardiomyocytes
				ko04270 Vascular smooth muscle contraction
				ko04390 Hippo signaling pathway
				ko04510 Focal adhesion
				ko04611 Platelet activation
				ko04720 Long-term potentiation
				ko04728 Dopaminergic synapse
				ko04750 Inflammatory mediator regulation of TRP channels
				ko04810 Regulation of actin cytoskeleton
				ko04910 Insulin signaling pathway
				ko04921 Oxytocin signaling pathway
				ko05031 Amphetamine addiction
				ko05034 Alcoholism
				ko05168 Herpes simplex infection
				ko05205 Proteoglycans in cancer
contig05831	K03456	Serine/threonine-protein phosphatase 2A regulatory subunit A	14	ko03015 mRNA surveillance pathway
				ko04111 Cell cycle - yeast
				ko04113 Meiosis - yeast
				ko04114 Oocyte meiosis
				ko04151 PI3K-Akt signaling pathway
				ko04261 Adrenergic signaling in cardiomyocytes
				ko04350 TGF-beta signaling pathway
contig05831	K03456	Serine/threonine-protein phosphatase 2A regulatory subunit A	14	ko04390 Hippo signaling pathway
				ko04391 Hippo signaling pathway - fly
				ko04530 Tight junction
				ko04728 Dopaminergic synapse
				ko04730 Long-term depression
				ko05142 Chagas disease (American trypanosomiasis) )
				ko05160 Hepatitis C
contig19405	K04371	mitogen-activated protein kinase 1/3	77	ko04010 MAPK signaling pathway
				ko04012 ErbB signaling pathway
				ko04013 MAPK signaling pathway - fly
				ko04014 Ras signaling pathway
				ko04015 Rap1 signaling pathway
				ko04062 Chemokine signaling pathway
				ko04066 HIF-1 signaling pathway
				ko04068 FoxO signaling pathway
				ko04114 Oocyte meiosis
				ko04150 mTOR signaling pathway
				ko04151 PI3K-Akt signaling pathway
				ko04261 Adrenergic signaling in cardiomyocytes
				ko04270 Vascular smooth muscle contraction
				ko04320 Dorso-ventral axis formation
				ko04350 TGF-beta signaling pathway
				ko04360 Axon guidance
				ko04370 VEGF signaling pathway
				ko04380 Osteoclast differentiation
				ko04510 Focal adhesion
contig19405	K04371	mitogen-activated protein kinase 1/3	77	ko04520 Adherens junction
				ko04540 Gap junction
				ko04611 Platelet activation
				ko04620 Toll-like receptor signaling pathway
				ko04621 NOD-like receptor signaling pathway
				ko04650 Natural killer cell mediated cytotoxicity
				ko04660 T cell receptor signaling pathway
				ko04662 B cell receptor signaling pathway
				ko04664 Fc epsilon RI signaling pathway
				ko04666 Fc gamma R-mediated phagocytosis
				ko04668 TNF signaling pathway
				ko04713 Circadian entrainment
				ko04720 Long-term potentiation
				ko04722 Neurotrophin signaling pathway
				ko04723 Retrograde endocannabinoid signaling
				ko04724 Glutamatergic synapse
				ko04725 Cholinergic synapse
				ko04726 Serotonergic synapse
				ko04730 Long-term depression
				ko04810 Regulation of actin cytoskeleton
				ko04910 Insulin signaling pathway
				ko04912 GnRH signaling pathway
				ko04914 Progesterone-mediated oocyte maturation
				ko04915 Estrogen signaling pathway
				ko04916 Melanogenesis
				ko04917 Prolactin signaling pathway
contig19405	K04371	mitogen-activated protein kinase 1/3	77	ko04919 Thyroid hormone signaling pathway
				ko04921 Oxytocin signaling pathway
				ko04930 Type II diabetes mellitus
				ko04960 Aldosterone-regulated sodium reabsorption
				ko05010 Alzheimer's disease
				ko05020 Prion diseases
				ko05034 Alcoholism
				ko05131 Shigellosis
				ko05132 Salmonella infection
				ko05133 Pertussis
				ko05140 Leishmaniasis
				ko05142 Chagas disease (American trypanosomiasis)
				ko05145 Toxoplasmosis
				ko05152 Tuberculosis
				ko05160 Hepatitis C
				ko05161 Hepatitis B
				ko05164 Influenza A
				ko05200 Pathways in cancer
				ko05203 Viral carcinogenesis
				ko05205 Proteoglycans in cancer
				ko05210 Colorectal cancer
				ko05211 Renal cell carcinoma
				ko05212 Pancreatic cancer
				ko05213 Endometrial cancer
				ko05214 Glioma
				ko05215 Prostate cancer
				ko05216 Thyroid cancer
contig19405	K04371	mitogen-activated protein kinase 1/3	77	ko05218 Melanoma
				ko05219 Bladder cancer
				ko05220 Chronic myeloid leukemia
				ko05221 Acute myeloid leukemia
				ko05223 Non-small cell lung cancer
